# Supplementary material
Source: publisher figshare collection journal article supplement (https://asha.figshare.com/articles/dataset/_/10565885)
Supplement: Supplementary file 4 [file 1]

## Supplemental Material S1: Speech Analysis Results

| Child    | Assessment          | PCC <sup>a</sup> | Phonetic inventory <sup>b,c</sup>                                                                                                                                                                                                                     |                                                                                      | Largest collapse |
|----------|---------------------|------------------|-------------------------------------------------------------------------------------------------------------------------------------------------------------------------------------------------------------------------------------------------------|--------------------------------------------------------------------------------------|------------------|
|          |                     |                  | Word initial position                                                                                                                                                                                                                                 | Word final position                                                                  |                  |
| Princess | Initial             | 61.0             | p b t d k g m n h w j<br>pw bw tw dw kw gw pj bj pl bl kl gl bɪ <sup>w</sup> tɪ <sup>w</sup><br>dɪ <sup>w</sup> kɪ <sup>w</sup>                                                                                                                       | p b t d k g m n ŋ f v s z ts dz l<br>C-/s/, C-/z/, nasal-C, /l/-C                    | 11:1             |
|          | Immediate follow-up | 62.7             | p b t d k g m n f (ʃ) h (tʃ) dʒ (ts) w j (l) ɪ <sup>w</sup><br>dw kw gw bj kj pl bl kl gl fl pɪ <sup>w</sup> bɪ <sup>w</sup> tɪ <sup>w</sup> dɪ <sup>w</sup><br>kɪ <sup>w</sup> ɡɪ <sup>w</sup> st                                                    | p b t d k g m n ŋ f v s z (ʃ) tʃ dʒ (ts) l<br>C-/s/, C-/z/, -ft, nasal-C             | 8:1              |
|          | Final follow-up     | 63.1             | p b t d k g m n f (θ) (ʃ) h (tʃ) w j l ɪ <sup>w</sup><br>tw kw pj bl kj nj pl bl kl gl sl pɪ bɪ tɪ dɪ kɪ<br>ɡɪ                                                                                                                                        | p b t d k g (?) m n ŋ f v s z ʃ tʃ dʒ l<br>C-/s/, C-/z/, /s/-C, nasal-C, /l/-C       | 8:1              |
| Thomas   | Initial             | 53.2             | p b t d k q <sup>h</sup> m n v s z h w (j)<br>pw bw tw dw fw                                                                                                                                                                                          | p b t d k g q <sup>h</sup> m n f v s z ʃ ts dz (l)<br>C-/s/, C-/z/, nasal-C, /l/-C   | 7:1              |
|          | Immediate follow-up | 72.5             | p b t d k g q <sup>h</sup> m n f v s z ʃ h tʃ dʒ w j (l) ɪ <sup>w</sup><br>pw bw tw kw gw fw kj pɪ <sup>w</sup> bɪ <sup>w</sup> tɪ <sup>w</sup> kɪ <sup>w</sup> fɪ <sup>w</sup><br>sɪ <sup>w</sup> st sk sn spw skw stɪ <sup>w</sup> skɪ <sup>w</sup> | p b t d k g m n f v s z ʃ (dʒ) ts l<br>C-/s/, C-/z/, /s/-C, -ft, nasal-C, /l/-C      | 2:1              |
|          | Final follow-up     | 74.5             | p b t d k g q <sup>h</sup> m n f v s z ʃ h tʃ dʒ w j ɪ <sup>w</sup><br>pw bw tw kw gw fw kj pɪ <sup>w</sup> bɪ <sup>w</sup> tɪ <sup>w</sup> kɪ <sup>w</sup> fɪ <sup>w</sup> sɪ <sup>w</sup><br>sp st sk sn spw skw stɪ <sup>w</sup> skɪ               | p b t d k g m n (ŋ) f v s z dʒ ts l<br>C-/s/, C-/z/, /s/-C, -pt, -ft, nasal-C, /l/-C | 2:1              |
| Owen     | Initial             | 39.7             | b d m n f v (s) ʃ h (tʃ) dʒ w j ɪ<br>tj dj nj bɪ ɡɪ                                                                                                                                                                                                   | p b t d m n f v s z (ʒ) tʃ (dʒ)<br>C-/s/, nasal-C                                    | 16:1             |
|          | Immediate follow-up | 46.1             | b t d g m n f v s z ʃ h tʃ dʒ w j ɪ                                                                                                                                                                                                                   | p b t d (k) m n (ŋ) f v s z ʃ tʃ l                                                   | 15:1             |

| Child    | Assessment          | PCC <sup>a</sup> | Phonetic inventory <sup>b,c</sup>                                                |                                          | Largest collapse |
|----------|---------------------|------------------|----------------------------------------------------------------------------------|------------------------------------------|------------------|
|          |                     |                  | Word initial position                                                            | Word final position                      |                  |
| Marshall | Final follow-up     | 44.0             | bw dj nj bl gl bɪ dɪ kɪ gɪ st skɪ                                                | C-/s/, nasal-C                           | 14:1             |
|          |                     |                  | p b t d k g m n f v s z ʃ h ʈ ɖ ʒ w j ɹ                                          | p b t d m n f v s z ʃ ʈ l                |                  |
|          |                     |                  | pw bw kw gw bj fj vj kl gl bɪ gɪ sp st sk stɪ skɪ                                | C-/s/, nasal-C                           |                  |
|          | Initial             | 29.1             | b d m n w j l                                                                    | p b t d m n l                            | 18:1             |
|          |                     |                  | bj, bl                                                                           | nasal-C                                  |                  |
|          |                     |                  | p b t d m n (f) v (h) w j l (ɹ) ɹ <sup>w</sup>                                   | p b t d (k) (g) ʔ m n (s) (z) ʃ (ɖ) l    |                  |
| Gracie   | Immediate follow-up | 35.5             | kj nj bl gl                                                                      | nasal-C                                  | 17:1             |
|          |                     |                  | p b t d (k) m n (f) (h) w j l ɹ <sup>w</sup>                                     | p b t d m n s (z) (ʃ) (ɖ) l              |                  |
|          |                     |                  | bj kj bl dw sn                                                                   | nasal-C                                  |                  |
|          | Final follow-up     | 34.0             | p b t d (k) m n (f) (h) w j l ɹ <sup>w</sup>                                     | p b t d m n s (z) (ʃ) (ɖ) l              | 15:1             |
|          |                     |                  | bj kj bl dw sn                                                                   | nasal-C                                  |                  |
|          |                     |                  | p b t d k g m n h w j l ɹ <sup>w</sup>                                           | p b t d k g m n ŋ f v s z ɖ l            |                  |
|          | Initial             | 52.5             | bw dw                                                                            | C-/s/, C-/z/, /s/-C, nasal-C, /l/-C      | 10:1             |
|          |                     |                  | p b t d k g m n f v (θ) ð s ʃ h ʈ ɖ ʒ w j l ɹ                                    | p b t d k g m n ŋ f v s z (ʃ) ɖ ʒ (ɖ) l  |                  |
|          |                     |                  | kw sw fj bl pɹ <sup>w</sup> bɹ <sup>w</sup> tɪ kɪ fɹ <sup>w</sup> sp st sn sl sw | C-/s/, C-/z/, /s/-C, nasal-C, /l/-C      |                  |
|          | Immediate follow-up | 79.4             | p b t d k g m n f v (θ) ð s ʃ h ʈ ɖ ʒ w j l ɹ                                    | p b t d k g m n ŋ f v s z (ʃ) ɖ ʒ (ɖ) l  | 5:1              |
|          |                     |                  | kw sw fj bl pɹ <sup>w</sup> bɹ <sup>w</sup> tɪ kɪ fɹ <sup>w</sup> sp st sn sl sw | C-/s/, C-/z/, /s/-C, nasal-C, /l/-C      |                  |
|          |                     |                  | p b t d k g m n f v (θ) ð s z ʃ h ʈ ɖ ʒ w j l ɹ                                  | p b t d k g m n ŋ f v (ð) s z ʃ ɖ ʒ l    |                  |
|          | Final follow-up     | 84.4             | kw sw pl bl kl gl fl pɹ bɹ tɪ kɪ gɪ fɹ sp st sk sn sl sw stɪ skɪ spl skw         | C-/s/, C-/z/, /s/-C, -ft, nasal-C, /l/-C | None             |
|          |                     |                  |                                                                                  |                                          |                  |

<sup>a</sup>PCC = percentage of consonants correct, as measured by the DEAP phonology subtest, <sup>b</sup>Sounds produced on 2 or more occasions within the speech sample are included, with marginal phones included in parentheses, <sup>c</sup>Specific word initial clusters are listed, whereas categories of word-final clusters are noted, (e.g., C-/s/ = word-final consonant + /s/ clusters; nasal-C = word-final nasal + consonant clusters)
